# Supplementary material
Source: Springer Nature journal article supplement (https://www.springermedizin.de/resource/supplementary/12245_2012_120_MOESM3_ESM.pdf/9672812)
Supplement: MOESM3 [file 9672812]

## Concept Map

Development guidelines for EMS providers to increase adherence

**The EC Practitioners answered the 'what' question**

### **Contextual factors**

Responses from various professional groups in a range of practice settings and practice settings

### **Guideline related factors**

Where guidelines are sourced or accessed

### **Healthcare provider factors**

Preferred formats and influence of experience

**Analysis of survey responses – 'how' to increase usability**

### **Guideline developers**

Engage EMS providers in guideline development process

### **Publishers of guidelines**

Increased awareness of patterns to source guidelines

### **Implementers of guidelines**

Promote value of guidelines to support enduring evidence-based behavior among EMS providers
